# Supplementary material for: High-throughput Plasmodium falciparum hrp2 and hrp3 gene deletion typing by digital PCR to monitor malaria rapid diagnostic test efficacy
Source: eLife. 2022 Jun 28;11:e72083. doi: 10.7554/eLife.72083 (PMC9246365; doi:10.7554/eLife.72083)
Supplement: Supplementary file 2. [file elife-72083-supp2.xlsx]

## Sheet: Field Samples
Site	hrp2 copies/uL DNA	tRNA_hrp2 copies/uL DNA	hrp2_exon1 copies/uL DNA	tRNA_hrp2ex1 copies/uL DNA	hrp3 copies/uL DNA	tRNA_hrp3 copies/uL DNA
Brazil	1250	1050			1680	1110		1.3
Brazil	185	157			195	157		49900
Brazil	29	33			49	27
Brazil	8	8			12	6.1
Brazil	1750	1660			1970	1730
Brazil	89	83			110	99
Brazil	128	85			132	106
Brazil	28	26			25	16
Brazil	147	168			215	156
Brazil	54	43			63	56
Brazil	297	306			425	337
Brazil	23	20			29	23
Brazil	860	860			1030	910
Brazil	590	610			794	627
Brazil	161	167			216	173
Brazil	28	16			25	27
Brazil	35	32			24	33
Brazil	52	41			71	50
Brazil	3000	2990			0	3140
Brazil	361	342			517	376
Brazil	253	235			304	216
Brazil	270	272			348	296
Brazil	195	226			248	222
Brazil	447	418			583	454
Brazil	1090	1250			1450	1280
Brazil	481	449			556	419
Brazil	22	24			28	21
Brazil	2100	2070			2200	2050
Brazil	482	555			553	475
Brazil	2550	2770			3280	2870
Brazil	303	363			366	347
Brazil	362	385			417	378
Brazil	2460	2620			3210	2560
Brazil	18050	16380			21330	11780
Brazil	2360	2520			2760	2300
Brazil	347	413			444	343
Brazil	610	670			651	588
Brazil	238	273			244	183
Brazil	0	74			0	68
Brazil	0	460			0.9	488
Brazil	0	259			0	249
Brazil	0	2020			0	2100
Brazil	0	121			0	126
Brazil	112	138			299	250
Brazil	247	285			327	291
Brazil	1670	1890			1920	1890
Brazil	0	115			0	120
Brazil	163	200			185	166
Brazil	0	1870			1.6	1610
Brazil	591	549			633	573
Brazil	0	313			0	381
Brazil	1060	1130			1260	1130
Brazil	664	736			810	780
Brazil	0	283			0	271
Brazil	5520	5720			6500	4540
Brazil	4690	4590			5800	4440
Brazil	0	1240			0	1250
Brazil	326	332			363	330
Brazil	1.7	184			0.8	173
Brazil	263	254			262	239
Brazil	228	220			301	236
Brazil	297	347			423	366
Brazil	0	344			0	400
Brazil	1810	1780			1870	1610
Brazil	372	430			482	466
Brazil	0	2730			0	3120
Brazil	0	367			0	409
Brazil	1500	1510			1550	1320
Brazil	1190	1170			1070	690
Brazil	326	317			373	270
Brazil	0	2000			0	1870
Brazil	3270	3420			3400	2820
Brazil	76	77			85	76
Brazil	27	28			34	38
Brazil	16	600			13	670
Brazil	0	3260			0	3420
Brazil	0	47			0	52
Brazil	3960	4230			5210	4370
Brazil	0	1070			0.8	1100
Brazil	0	1210			0	1230
Brazil	0	592			0	670
Brazil	333	320			345	339
Brazil	0	103			0	87
Brazil	0	12230			0	8280
Brazil	0	653			0	610
Brazil	0	2700			0	47
Brazil	0	3580			0	4290
Brazil	0	1080			0	1010
Brazil	0	50			0	58
Brazil	0	2220			0	53
Brazil	0	445			0	12
Brazil	0	920			0	940
Brazil	0	770			0	766
Brazil	0	2020			1	2140
Brazil	0	465			0	456
Brazil	0	581			0	545
Brazil	0	56			0	63
Brazil	0	1050			0	1350
Brazil	0	545			0	599
Brazil	664	629			730	585
Brazil	0	3560			0	3110
Brazil	0	2390			0	2020
Brazil	0	1130			0	1060
Brazil	0	1370			0	1320
Brazil	0	2610			0	2680
Brazil	0	336			0.9	328
Brazil	0	143			0	361
Brazil	0	528			0	376
Brazil	0	5090			3	3440
Brazil	1	432			0	458
Brazil	0	780			0	950
Brazil	0.9	254			0	222
Brazil	0	980			0	950
Brazil	0	860			0	820
Brazil	2280	2150			2590	2340
Brazil	0	378			0	390
Brazil	0	92			0	122
Brazil	0	230			0	227
Brazil	2.3	6			0	3
Brazil	131	137			0	170
Brazil	285	291			206	345
Brazil	284	276			0	284
Brazil	0	226			0	221
Brazil	0	501			0	486
Brazil	13	21			0	12
Brazil	0	3.8			0	3.5
Brazil	0	161			0	164
Brazil	0	1240			0	1360
Brazil	15	22			0	8
Brazil	0	13			0	13
Brazil	0	57			0	49
Brazil	0	330			0	346
Brazil	0	1190			0	1170
Brazil	0	2550			1	2430
Brazil	6.7	10			0	5.6
Brazil	0	424			0	395
Brazil	69	69			0	62
Brazil	0	282			0	244
Brazil	0	433			0	434
Brazil	0	114			0	192
Brazil	0	327			0	236
Brazil	0	618			0	594
Brazil	0	376			0	384
Brazil	105	118			0	135
Brazil	0	533			0	271
Brazil	0	12880			0	13950
Brazil	0	240			0	186
Brazil	1510	1620			0	1300
Brazil	0	281			0	271
Brazil	0	398			0	412
Brazil	0	1060			0	930
Brazil	0	62			0	61
Brazil	66	59			0	57
Brazil	10670	11010			0	11140
Brazil	0	325			0	311
Brazil	185	185			0	157
Brazil	1210	1180			0	1130
Brazil	0	1630			0	1410
Brazil	0	9			0	7
Brazil	220	190			1.3	140
Brazil	125	109			0	118
Brazil	9590	9810			0	9380
Brazil	1040	1010			0	870
Brazil	1320	1150			0	1170
Brazil	0	94			0	124
Brazil	15350	15670			0.9	15080
Brazil	1170	1130			0	1080
Brazil	688	661			0	630
Brazil	5260	5530			0	4810
Brazil	1310	1420			0	1450
Brazil	84	99			0	91
Brazil	28	26			0	20
Brazil	156	168			0	165
Brazil	18	14			0.9	15
Brazil	13	14			0.9	7
Brazil	0	5.7			0.7	2.2
Brazil	0	102			0	102
Brazil	1540	1540			0	1370
Brazil	0	535			0	549
Brazil	17	15			16	7
Brazil	246	237			0	187
Brazil	0	2.5			0	2.8
Brazil	0	10			0	13
Brazil	0	24			0	26
Brazil	372	421			475	443
Brazil	1030	1090			1500	1120
Brazil	36	42			67	50
Ecuador	446	426	444	412	476	429
Ecuador	30	26	29	33	41	37
Ecuador	34	30	41	37	43	25
Ecuador	92	93	75	71	91	78
Ecuador	25	31	23	30	38	30
Ecuador	1700	1660	1550	1570	1750	1600
Ecuador	26	30	33	35	40	25
Ecuador	4.6	2.3	3	2	1	2.1
Ecuador	42	20	40	26	33	40
Ecuador	299	263	177	213	263	255
Ecuador	117	116	125	126	138	119
Ecuador	10	4	5.9	23	0	9
Ecuador	18	14	10.8	12.8	0	19
Ecuador	47	72	45	33	37	48
Ecuador	24	9	17	13	14	17
Ecuador	8	8	2	6.1	9	3.4
Ecuador	111	85	144	93	101	101
Ecuador	4.1	3.1	0.7	2	1.8	4
Ecuador	271	229	236	228	252	235
Ecuador	103	101	90	81	93	100
Ecuador	52	67	26	24	0	42
Ecuador	4.4	4.4	5.2	3.2	0	3.7
Ecuador	173	140	144	132	0	148
Ecuador	38	41	13	31	0	21
Ecuador	7	5.1	3.8	5.3	0	3.8
Ecuador	30	21	5.3	6.1	0	6
Ecuador	8	6.3	3.4	5.4	0	4.8
Ecuador	8	12	2.2	2.2	8	11
Ecuador	3.68	4.8	6.5	3.3	0	3.7
Ecuador	62	42	50	44	0	26
Ecuador	7	3.1	6.6	7.3	0	3.4
Ecuador	29	12	15	9	0	7
Ecuador	660	490	267	258	0	307
Ecuador	13	12	10	9	0	10
Ecuador	24	12	5.6	7.2	0	10
Ecuador	142	114	135	121	0	108
Ecuador	44	50	23	18	0	14
Ecuador	16	13	5.8	1.9	0	5.2
Ecuador	10	11	15	11	0	9
Ecuador	32	20	18	10	0	10
Ecuador	55	59	41	38	0	70
Ethiopia	389	404	384	359	0	384
Ethiopia	1210	1250	1220	1360	1.8	1480
Ethiopia	72	95	98	88	0	82
Ethiopia	4580	4260	5450	5760	0	4970
Ethiopia	1090	1130	1090	1200	1270	1290
Ethiopia	1060	1120	1120	1170	0	1300
Ethiopia	8680	8210	8570	8790	0	9600
Ethiopia	720	820	720	820	740	870
Ethiopia	4980	4980	1440	1540	0	4730
Ethiopia	830	920	880	930	0	1020
Ethiopia	2930	2470	2870	2880	0	3090
Ethiopia	1050	1100	1350	1670	2470	2080
Ethiopia	2870	2820	3090	3260	0	3390
Ethiopia	6230	6250	5820	6140	9210	6350
Ethiopia	21	16	16	18	17	26
Ethiopia	8	5.3	3.8	8	0	15
Ethiopia	21	33	41	35	0	43
Ethiopia	234	240	235	233	0	237
Ethiopia	13	12	3.3	3.3	0	21
Ethiopia	78	104	56	62	0	96
Ethiopia	23	37	16	20	0	22
Ethiopia	9	12	4.9	5.9	0	12
Ethiopia	52	55	46	31	0	47
Ethiopia	40	56	50	57	0	24
Ethiopia	140	96	173	213	0	79
Ethiopia	118	126	86	113	0	86
Ethiopia	8	24	16	31	0	2.2
Ethiopia	15	17	8	7	0.9	9
Ethiopia	8	1.9	5.6	2.4	0	4.3
Ethiopia	18	18	19	32	0	4.7
Ethiopia	55	67	23	39	0	14
Ethiopia	220	232	123	147	0	68
Ethiopia	8	3.2	0.9	1.8	0	4
Ethiopia	32	36	11	24	0	31
Ethiopia	77	55	85	85	0	139
Ethiopia	46	56	34	43	0	108
Ethiopia	102	139	87	87	0	143
Ethiopia	239	266	194	279	0	286
Ethiopia	44	73	44	59	0	72
Ethiopia	27	27	16	32	0	23
Ethiopia	770	930	645	870	950	1020
Ethiopia	359	432	349	392	662	741
Ethiopia	595	696	542	692	0	900
Ethiopia	167	187	168	187	188	172
Ethiopia	0	212	0.6	190	0	189
Ethiopia	1120	1290	1050	1180	1290	1270
Ethiopia	8940	9090	9120	10150	10510	7370
Ghana	12	9	7	5.8	6.3	7.1
Ghana	6.1	7	11	12	6.6	10
Ghana	10	7	10	10	15	6.8
Ghana	4.9	3.9	1	3.9	8	5.3
Ghana	11	14	13	26	13	10
Ghana	4.7	5.6			2.8	2.8
Ghana	7	4.1	1.1	3.2	2.6	1.7
Ghana	305	288	243	266	264	278
Ghana	14	10	14	10	10	13
Ghana	3	3	5.8	3.3	2.2	5.9
Ghana	1.5	4	3.9	3.9	6.6	1.7
Ghana	283	298	307	285	425	396
Ghana	48300	49900	41300	49600	53500	13900
Ghana	4.3	4.3	5	8	6.6	3.7
Ghana	389	356	447	409	485	429
Ghana	11	11	14	9	15	13
Ghana	14	12	19	9	16	11
Ghana	20	9	19	18	17	19
Ghana	37	29	32	35	34	36
Ghana	632	633	700	880	760	820
Ghana	1200	990	920	980	910	930
Ghana	245	251	276	319	353	323
Ghana	491	516	553	600	580	560
Ghana	3.8	3.8	1.5	1.5	3	5.9
Ghana	566	584	653	671	623	645
Ghana	10.6	9.5	7.5	8.2	6.9	10.9
Ghana	3.6	2.7	2.3	1.2	1.2	1.7
Ghana	5	2.9	2.3	3.9	0.9	11
Ghana	50	58	63	69	79	66
Ghana	675	650	755	765	880	860
Ghana	507	503	526	512	677	639
Ghana	567	632	564	608	573	592
Ghana	198	193	167	162	158	140
Ghana	1.4	2.1	4.6	2.3	0.8	6.3
Ghana	16	14	13	9.2	11	10
Ghana	48	48	48	63	52	63
Ghana	224	222	348	343	345	357
Ghana	23	29	30	20	32	36
Ghana	1	1.6	1.4	1.4	1.7	3.4
Ghana	99	89	98	106	86	91
Ghana	1200	1120	1080	1150	1200	1180
Ghana	3040	3050	2710	2870	2640	2740
Ghana	2950	2850	2790	2930	2860	2860
Ghana	198	183	196	196	198	193
Ghana	167	175	198	161	167	171
Ghana	4.5	4.5	9	6.3	10	6.1
Ghana	506	462	406	459	432	459
Ghana	5	12	10	11	14	8
Ghana	1240	1250	1000	1060	1140	1190
Ghana	2100	1990	2400	2320	2350	2300
Ghana	618	567	1860	1960	1730	1720
Ghana	487	530	609	613	507	570
Ghana	17	12	13	13	14	9
Ghana	0.6	3.2	2.3	2.3	1.5	1.5
Ghana	2.2	2.2	3.4	3.4	4	3.3
Ghana	60	63	47	43	49	45
Ghana	38	37	51	52	62	82
Ghana	269	261	408	387	454	469
Ghana	321	322	277	244	315	320
Ghana	580	622	613	629	620	631
Ghana	122	124	139	124	104	138
Ghana	11	7.2	7	8	7	5.5
Ghana	17	20	21	23	15	25
Ghana	790	800	721	696	780	746
Ghana	540	530	506	543	527	538
Ghana	77	66	56	66	54	74
Ghana	31	23	27	22	27	30
Ghana	32	36	30	34	36	32
Ghana	236	221	183	209	220	194
Ghana	3450	3220	3770	3800	3580	12070
Ghana	2570	2390	2670	2680	1970	1920
Ghana	3540	3640	3850	4090	4250	3140
Ghana	678	606	644	623	491	517
Ghana	5.6	10	6.4	7.1	5.5	4.7
Ghana	335	324	296	312	286	267
Ghana	700	690	652	686	750	820
Ghana	440	550	544	511	559	580
Ghana	17	16	18	18	12	15
Ghana	112	109	119	104	105	98
Ghana	25	20	20	21	28	22
Ghana	275	262	228	220	230	237
Ghana	2340	2350	2220	2380	2340	2340
Ghana	1380	1280	1280	1330	1310	1340
Ghana	1.7	1.7	4.2	4.2	3.6	2.9
Ghana	76	81	60	78	83	73
Ghana	8	5.2	7	7	10	5.9
Ghana	101	75	102	86	86	74
Ghana	244	224	248	220	205	203
Ghana	144	173	177	159	174	165
Ghana	279	268	218	248	241	250
Ghana	710	660	582	578	650	740
Ghana	750	710	678	712	780	820
Ghana	16	16	20	12	15	19
Ghana	4.5	1.3	1.9	1.9	5.3	3
Ghana	5	3.7	3.8	9	0.9	10
Ghana	79	85	86	84	69	74
Ghana	364	361	413	402	379	417
Ghana	451	455	421	393	396	405
Ghana	410	424	394	441	434	408
Ghana	63	59	61	62	45	61
Ghana	96	90	163	166	201	217
Ghana	58	84	254	268	235	253
Ghana	840	780	832	910	900	920
Ghana	7	5.2	5.2	5.7	6.9	2.6
Ghana	385	351	533	568	525	551
Ghana	157	122	843	834	814	820
Ghana	134	134	1930	2020	2260	2230
Ghana	772	733	818	766	690	780
Ghana	521	539	594	601	594	614
Ghana	17	13	20	24	23	23
Ghana	6.3	7	11	9.3	8	6.7
Ghana	21	9	490	465	433	495
Ghana	930	930	1080	1030	1010	1000
Ghana	49	52	82	76	74	81
Ghana	3.3	2	3.4	4.4	1.7	12
Ghana	5480	5740	6160	6210	5680	5820
Ghana	800	730	773	836	800	840
Ghana	1130	1070	990	950	1000	1040
Ghana	916	894	2510	3180	2210	1840
Ghana	610	652	582	619	640	590
Ghana	29	32	31	36	24	13
Ghana	158	160	1940	2030	2180	2260
Ghana	200	223	280	275	284	292
Ghana	659	630	765	840	790	790
Ghana	980	1030	1080	1080	1100	1130
Ghana	4.9	5.6	2.9	4.3	2.9	4.8
Ghana	262	242	758	796	800	810
Ghana	953	971	996	1070	1060	1090
Ghana	10	11	12	16	4.8	12
Ghana	990	980	960	1000	1020	1070
Ghana	3.1	3.7	4.4	5	2.9	7
Ghana	16	18	165	163	214	202
Ghana	6.9	5.3	6.8	8.4	4.2	8.4
Ghana	67	52	350	319	261	269
Ghana	4560	4480	5620	5470	4750	4990
Ghana	5.3	1.3	1.5	3.1	0	3.4
Ghana	59	53	59	70	72	69
Ghana	7.2	5.2	7.5	7.5	5.6	4
Ghana	980	990	950	990	920	940
Ghana	1090	980	1040	1040	1090	1110
Ghana	599	628	1210	1190	1210	1170
Ghana	52	54	517	560	524	547
Ghana	1150	1080	1270	1230	182	1220
Ghana	166	190	237	245	243	230
Ghana	385	426	1490	1490	1970	1880
Ghana	150	151	1730	1790	1860	1830
Ghana	17	1040	21	17	14	21
Ghana	34	42	44	44	36	38
Ghana	264	290	298	287	173	335
Ghana	145	104	1560	1570	1650	1700
Ghana	31	25	35	30	36	32
Ghana	182	187	1210	1230	1280	1270
Ghana	419	399	494	520	420	470
Ghana	27	27	14	17	14	18
Ghana	775	782	737	759	870	800
Ghana	4.5	4.5	3.1	5.6	5	4
Ghana	2510	2430	2790	2920	2770	2830
Ghana	1970	1890	2320	2290	2370	2330
Ghana	5.1	2	2.6	6.9	7	6.1
Ghana	21	15	915	908	810	800
Ghana	548	530	584	587	531	590
Ghana	312	281	950	960	910	900
Ghana	280	233	4190	4150	2910	2780
Ghana	930	881	1010	1020	1060	940
Ghana	1140	1180	1880	1910	1240	1270
Ghana	182	206	219	212	226	263
Ghana	55	49	89	104	103	114
Ghana	2470	3300	2940	3010	3280	3320
Ghana	0.7	1.4	2.7	2.1	0.8	1.6
Ghana	1560	1520	1520	1590	1410	1470
Ghana	1100	850	940	1010	1020	1090
Ghana	211	222	201	204	191	228
Ghana	34	32	25	31	38	29
Ghana	549	504	505	541	508	562
Ghana	387	379	436	392	380	412
Ghana	373	266	434	404	470	500
Ghana	247	227	269	266	238	296
Ghana	169	159	229	225	191	221
Ghana	136	128	141	145	163	168
Ghana	17	10	10	10	6.5	3.7
Ghana	16	18	19	18	19	17
Ghana	138	127	145	160	139	143
Ghana	238	218	215	231	198	195
Ghana	238	218	230	229	204	211
Ghana	346	359	339	320	337	346
Ghana	9.4	13	10.1	10.7	12	7.8
Ghana	593	574	577	539	552	523
Ghana	87	83	74	94	76	79
Ghana	7.2	6.7	11	5	11	4.4
Ghana	275	270	289	299	267	287
Ghana	5180	4990	5340	5150	6570	6230
Ghana	17	21	15	15	8.8	16
Ghana	645	653	425	419	424	462
Ghana	2210	2130	2690	2550	2770	2660
Ghana	1150	1120	1030	1030	1000	1060
Ghana	10290	10120	7090	7100	8060	8140
Ghana	660	520	431	447	439	443
Ghana	611	588	507	549	507	485
Ghana	4	4	2	6	1.4	3.6
Ghana	437	437	410	402	378	387
Ghana	1110	1050	910	950	960	970
Ghana	114	114	111	102	122	120
Ghana	348	364	341	351	334	316
Ghana	1490	1380	1530	1500	1500	1490
Ghana	3700	3500	3140	3110	3070	3010
Ghana	399	405	438	407	375	412
Ghana	197	177	185	161	182	185
Ghana	339	312	339	383	262	314
Ghana	3880	3720	3390	3430	3300	2240
Ghana	3.1	2	2.3	2.8	1.9	1.9
Ghana	10.5	11.5	12	12.5	10.9	15
Ghana	752	761	706	699	670	708
Ghana	2680	2690	1830	1830	2100	2060
Ghana	25	19	18	21	18	15
Ghana	210	193	190	188	183	193
Ghana	1520	1600	1650	1720	1400	1400
Ghana	1050	950	1030	1000	950	920
Ghana	7.6	9.5	8.3	10.3	9.4	8.3
Ghana	367	369	333	378	384	409
Ghana	175	135	140	157	144	145
Ghana	249	235	256	244	251	256
Ghana	23760	22830	20120	19090	20140	15450
Ghana	40	33	39	37	32	36
Kenya	5.7	5.7	2.7	3.6	1	8
Kenya	77	63	78	70	70	58
Kenya	550	571	542	556	697	710
Kenya	33	29	21	34	46	44
Kenya	17	18	11	22	17	20
Kenya	960	970	1060	1040	1350	1310
Kenya	178	169	152	171	265	273
Kenya	310	244	288	268	262	289
Kenya	222	189	177	170	223	233
Kenya	26	32	25	25	37	36
Kenya	10	14	3.8	7	13	10
Kenya	40	40	43	51	40	43
Kenya	85	75	84	79	87	74
Kenya	810	800	711	712	890	870
Kenya	1010	1020	1020	1050	1040	1030
Kenya	10	8	3.3	13	10	15
Kenya	990	780	748	643	950	730
Kenya	67	75	93	64	75	66
Kenya	6	10	6.2	12	14	7.9
Kenya	850	830	586	638	682	681
Kenya	20	21	24	18	18	16
Kenya	1040	1030	890	930	1280	1140
Kenya	1330	1380	1260	1300	1570	1620
Kenya	60	49	68	50	60	61
Kenya	102	67	94	81	90	84
Kenya	88	75	60	46	77	59
Kenya	85	88	108	98	98	99
Kenya	46	31	40	40	39	58
Kenya	23	22	9	19	21	21
Kenya	342	316	305	289	250	260
Kenya	9	9	9	11	5.6	9
Kenya	100	96	127	125	121	117
Kenya	2	3	1.9	10	4	6
Kenya	1190	1050	1020	950	1140	990
Kenya	3.7	5.5	2.4	4	4.4	5.3
Kenya	9	2	4.2	3.4	7	11
Kenya	408	383	303	314	441	404
Kenya	19	21	19	23	29	24
Kenya	8	2.9	3.6	3.6	8	13
Kenya	41	40	34	18	27	31
Kenya	32	28	28	32	36	27
Kenya	2.3	7			4.5	5.4
Kenya	176	196	155	140	189	178
Kenya	160	152	203	192	158	193
Kenya	9	9	11	5.9	10	14
Kenya	22	14	11	14	12	17
Kenya	10	6	9	8	11	10
Kenya	69	56	59	62	57	58
Kenya	59	51	45	43	60	60
Kenya	6	10	8	7	12	8
Kenya	44	42	35	46	58	42
Kenya	6	13	7.4	4.1	8	4.1
Kenya	4.2	4.2	7.4	4.1	8	4.1
Kenya	1390	1260	1380	1340	1370	1260
Kenya	8	6	7.7	3.8	8	6.7
Kenya	371	347	338	314	380	405
Kenya	13	11	15	18	16	26
Kenya	400	411	423	390	380	432
Kenya	328	322	362	383	415	484
Kenya	9	8	15	15	10	16
Kenya	800	780	800	840	970	880
Kenya	629	608	602	575	620	620
Kenya	740	740	660	700	820	870
Kenya	498	363	277	208	334	288
Kenya	780	750	707	709	940	860
Kenya	31	33	19	23	37	40
Kenya	1450	1490	2190	2230	2560	2110
Kenya	21	16	21	8	16	21
Kenya	6.2	9	5.8	3.9	6.4	6.4
Kenya	470	430	466	434	512	534
Kenya	9	3.7	11	8	12	7
Kenya	66	45	45	50	43	59
Kenya	515	524	435	445	543	516
Kenya	8	6.5	2.9	2.9	4.9	7.3
Kenya	7	10	7	9	11	10
Kenya	2600	2590	2200	2300	2810	2260
Kenya	78	99	81	93	83	90
Kenya	379	447	384	367	445	449
Kenya	1660	1820	1240	1350	1250	1280
Kenya	657	658	577	621	628	720
Kenya	590	602	590	617	712	739
Kenya	272	277	271	275	340	346
Kenya	363	303	342	313	428	354
Kenya	80	67	92	83	63	79
Kenya	10	9	13	10	9	17
Kenya	67	79	53	59	68	75
Kenya	70	40	62	41	50	62
Kenya	286	236	219	205	245	244
Kenya	4950	4300	3490	3280	3430	2770
Kenya	244	219	89	89	142	124
Kenya	133	114	89	89	142	124
Kenya	1480	1520	1450	1540	1490	1420
Kenya	440	404	341	333	446	456
Kenya	500	500	406	398	438	469
Kenya	174	146	123	133	114	104
Kenya	682	609	359	327	408	370
Kenya	12	6	8.1	13	15	10
Kenya	15	14	10	14	14	20
Kenya	373	359	298	283	387	341
Kenya	41	46	39	28	33	40
Kenya	110	142	110	108	138	183
Kenya	76	87	65	59	72	74
Kenya	1510	1360	1280	1310	1610	1680
Kenya	65	58	41	60	54	44
Kenya	284	304	282	284	263	282
Kenya	25	23	31	27	30	30
Kenya	57	48	46	55	45	42
Kenya	210	151	139	137	175	170
Kenya	415	396	341	352	396	376
Kenya	97	93	71	81	87	79
Kenya	36	22	25	21	32	47
Kenya	1000	1010	990	1000	980	850
Kenya	212	210	201	204	227	272
Kenya	8	6.4	10	3.2	6.6	11
Kenya	1570	1410	1080	1030	1220	1170
Kenya	36	16	18	23	27	25
Kenya	660	600	472	476	568	610
Kenya	366	322	432	357	333	333
Kenya	2670	2680	2800	2780	2760	2580
Kenya	221	175	231	190	215	207
Kenya	118	127	110	122	105	114
Kenya	81	106	66	79	76	90
Kenya	30	25	29	29	37	30
Kenya	187	181	161	193	191	196
Kenya	9	5.3	5.4	6.3	7	4.2
Kenya	2.1	6	6	2.6	4.1	4.1
Kenya	91	107	84	87	84	103
Kenya	64	55	61	44	57	63
Kenya	7	7	3.4	5.1	7	10
Kenya	43	66	47	54	57	76
Kenya	46	42	34	47	36	48
Kenya	23	19	27	27	17	15
Kenya	1230	1250	1180	1230	1170	1240
Kenya	642	577	525	521	600	640
Kenya	5.5	5.5	5.8	7.5	5.7	9
Kenya	3.5	1.4	1.6	4.8	4.3	6.8
Kenya	231	224	214	250	261	233
Kenya	12	19	15	19	13	19
Kenya	380	410	342	354	406	450
Kenya	360	359	336	316	353	355
Kenya	2610	2530	2390	2460	2690	2590
Kenya	3.8	19	9	4.6	8	10
Kenya	7	10	9	6	5.1	9
Kenya	7.4	11	6.9	9	7	3.3
Kenya	625	574	548	597	642	626
Kenya	930	960	950	1000	990	1030
Kenya	1550	1510	1650	1550	1660	1670
Kenya	53	42	49	45	46	62
Kenya	930	900	1030	930	820	830
Kenya	9	7	7.2	9	4.5	8
Kenya	1730	1730	1920	1850	1750	1570
Kenya	25	13	24	23	17	22
Kenya	203	201	192	191	201	185
Kenya	56	53	41	25	48	51
Kenya	248	221	264	234	282	263
Kenya	1030	1070	1020	1050	974	961
Kenya	592	529	513	526	585	590
Kenya	12	9	5.5	4.7	15	14
Kenya	1250	1110	1130	1060	1210	1190
Kenya	829	778	746	827	890	930
Kenya	5470	5360	4730	4970	5150	4950
Kenya	180	192	131	156	111	119
Kenya	171	183	159	151	127	159
Kenya	7	12	9	3.4	8	11
Kenya	147	131	142	142	154	163
Kenya	11	9	9	10	11	15
Kenya	1270	1260	1130	1180	1270	1340
Kenya	21	21	22	20	21	27
Kenya	66	75	59	75	59	82
Kenya	10	7	5.7	14	13	7
Kenya	1.6	4	3.7	6.5	6.2	6.2
Kenya	2570	2380	2370	2400	2430	2360
Kenya	5.5	10	4.4	3.5	10	7
Kenya	84	83	79	71	83	102
Kenya	138	168	171	166	141	150
Kenya	10	8	10	10	8	4.9
Kenya	6	6	6.7	3.4	7	13
Kenya	222	225	209	227	204	243
Kenya	4.1	7.4	8	10	4.2	7
Kenya	132	154	159	143	174	187
Kenya	34	34	27	24	31	32
Kenya	2.2	3.3	7.9	12	0.8	4.2
Kenya	331	350	363	352	358	363
Kenya	3480	3210	3220	3170	2790	2530
Kenya	10	11	7	12	6.8	12
Kenya	193	172	154	162	156	156
Kenya	731	686	770	630	664	723
Kenya	10	3.4	5.7	4.9	5	4.2
Kenya	1860	1700	1770	1740	1660	1630
Kenya	91	81	129	105	129	126
Kenya	3.5	2.1	0.9	3.5	2.2	9
Kenya	214	231	201	205	219	222
Kenya	127	157	112	166	119	173
Kenya	103	120	93	137	79	111
Kenya	9	2.9	11	11	11	19
Kenya	23	13	22	24	26	23
Kenya	26	28	33	30	27	31
Kenya	920	1080	880	1030	1050	1180
Kenya	535	595	1210	1320	670	760
Kenya	1290	1410	1250	1380	1360	1440
Kenya	1460	1450	1570	1560	1540	1520
Kenya	19	23	23	16	20	17
Kenya	6.1	2.3	6.8	8.3	3.8	8
Kenya	1.2	1.8	1.7	5.2	2	1.3
Kenya	1720	1640	1780	1760	1830	1770
Kenya	2370	2340	2020	2220	2470	2380
Kenya	1.4	2.9	3.1	3.9	9	3.1
Kenya	375	357	335	351	385	345
Kenya	331	392	403	426	462	446
Kenya	422	379	408	384	472	521
Kenya	129	108	118	118	136	118
Kenya	41	33	42	45	31	29
Kenya	358	337	291	290	253	274
Kenya	1550	1590	1500	1560	1440	1490
Kenya	2900	2850	3000	3160	1750	1680
Kenya	112	105	78	104	100	101
Kenya	9	3.6	6	3.2	5.9	7.4
Kenya	154	114	113	135	133	134
Kenya	850	770	850	830	820	800
Kenya	29	37	30	37	30	29
Kenya	53	55	66	64	52	69
Kenya	4440	4470	4280	4610	4390	4520
Kenya	672	645	560	590	419	527
Kenya	112	120	128	107	94	118
Kenya	2120	2130	2120	2180	2260	2340
Kenya	707	718	615	634	736	744
Kenya	28	27	26	23	26	27
Kenya	33	26	29	36	39	34
Kenya	228	230	217	224	218	243
Kenya	42	42	35	42	41	36
Kenya	137	130	140	120	154	152
Kenya	25	15	18	28	15	21
Kenya	1840	1800	1850	1800	1740	1870
Kenya	27	27	27	22	20	32
Kenya	161	152	147	154	147	149
Kenya	113	128	98	99	106	107
Kenya	425	459	409	452	403	443
Kenya	115	113	125	122	110	116
Kenya	405	364	362	315	372	377
Kenya	10	9	10	10	13	10
Kenya	484	460	426	463	463	519
Zanzibar/Tanzania	18	42	19	32	21	30
Zanzibar/Tanzania	36	34	31	38	35	46
Zanzibar/Tanzania	950	1150	850	1370	1290	1280
Zanzibar/Tanzania	1510	2050	1220	2220	1980	2120
Zanzibar/Tanzania	1980	2730	1820	2980	2540	2850
Zanzibar/Tanzania	303	435	252	480	403	487
Zanzibar/Tanzania	26	45	24	46	50	51
Zanzibar/Tanzania	1090	1480	920	1420	1250	1420
Zanzibar/Tanzania	153	209	151	200	192	224
Zanzibar/Tanzania	7	4.5	2.3	6	5	7
Zanzibar/Tanzania	268	380	207	327	292	312
Zanzibar/Tanzania	4	6	2.2	5.8	11	4.8
Zanzibar/Tanzania	300	386	246	481	472	435
Zanzibar/Tanzania	657	884	542	870	900	860
Zanzibar/Tanzania	101	120	93	136	120	125
Zanzibar/Tanzania	11	10	9	9	6.1	8.1
Zanzibar/Tanzania	153	207	121	223	199	203
Zanzibar/Tanzania	7.6	10	3.2	8	10	10
Zanzibar/Tanzania	15	26	22	19	21	30
Zanzibar/Tanzania	45	44	45	52	51	72
Zanzibar/Tanzania	111	143	107	141	140	124
Zanzibar/Tanzania	700	826	457	540	810	790
Zanzibar/Tanzania	33	44	38	50	39	37
Zanzibar/Tanzania	99	144	75	124	117	135
Zanzibar/Tanzania	52	68	44	70	72	73
Zanzibar/Tanzania	14	14	16	16	19	22
Zanzibar/Tanzania	7180	9400	5700	9530	8660	6930
Zanzibar/Tanzania	110	152	100	140	119	138
Zanzibar/Tanzania	9.2	11	7.3	12	9.2	9.8
Zanzibar/Tanzania	418	601	363	546	555	600
Zanzibar/Tanzania	23	25	17	34	26	25
Zanzibar/Tanzania	3.6	9.6	3	7.4	6.4	5.7
Zanzibar/Tanzania	6.6	8.1	4	10	13	17
Zanzibar/Tanzania	11	10	12	10	8.4	13
Zanzibar/Tanzania	11	14	13	13	15	15
Zanzibar/Tanzania	1100	1220	1000	1280	1250	1240
Zanzibar/Tanzania	501	606	493	603	615	666
Zanzibar/Tanzania	135	127	113	153	175	144
Zanzibar/Tanzania	11	14	14	14	14	18
Zanzibar/Tanzania	4.5	5.1	2.6	2.6	3.1	4.6
Zanzibar/Tanzania	15	21	8	19	10	21
Zanzibar/Tanzania	6.9	7.7	8	4.9	8.1	4.4
Zanzibar/Tanzania	110	122	102	126	130	121
Zanzibar/Tanzania	144	181	152	180	179	195
Zanzibar/Tanzania	138	158	90	40	171	165
Zanzibar/Tanzania	588	760	527	740	760	720
Zanzibar/Tanzania	11	19	7.4	17	14	12
Zanzibar/Tanzania	6.9	12	6.5	9	8.6	10
Zanzibar/Tanzania	11	12	8	13	3.8	3.1
Zanzibar/Tanzania	9	17	12	15	8	15
Zanzibar/Tanzania	248	292	204	296	276	258
Zanzibar/Tanzania	79	88	65	65	90	75
Zanzibar/Tanzania	13	13	9	5.5	11	7.8
Zanzibar/Tanzania	333	351	280	348	42	40
Zanzibar/Tanzania	38	38	33	35	45	48
Zanzibar/Tanzania	6.5	8	7.2	7.2	10	10
Zanzibar/Tanzania	1.7	2.5	4.8	4.8	3.4	3.4
Zanzibar/Tanzania	72	95	88	90	83	95
Zanzibar/Tanzania	59	71	60	66	79	82
Zanzibar/Tanzania	11330	11550	10340	14440	12170	9540
Zanzibar/Tanzania	252	287	229	231	277	273
Zanzibar/Tanzania	7.1	4.7	9	5.7	5.6	5.6
Zanzibar/Tanzania	11	14	12	17	10	10
Zanzibar/Tanzania	333	356	327	412	436	436
Zanzibar/Tanzania	900	900	700	760	790	753
Zanzibar/Tanzania	6800	7370	6080	8050	9640	5910
Zanzibar/Tanzania	14	7.9	13	16	9	8
Zanzibar/Tanzania	8.2	19	8	9	9	11
Zanzibar/Tanzania	7230	7020	6120	9430	7910	7100
Zanzibar/Tanzania	15	17	20	27	22	29
Zanzibar/Tanzania	24	32	21	34	33	35
Zanzibar/Tanzania	13	14	9	6.9	15	16
Zanzibar/Tanzania	24	35	25	40	29	34
Zanzibar/Tanzania	3590	5140	2910	5620	4920	4920
Zanzibar/Tanzania	178	239	151	238	263	293
Zanzibar/Tanzania	31	30	102	153	140	147
Zanzibar/Tanzania	44	65	27	47	50	53
Zanzibar/Tanzania	9	7.8	6	13	10	15
Zanzibar/Tanzania	14	12	95	147	140	147
Zanzibar/Tanzania	16	44	18	31	28	43
Zanzibar/Tanzania	87	115	89	132	129	132
Zanzibar/Tanzania	7.4	9	9	9	9	10
Zanzibar/Tanzania	44	55	32	59	43	64
Zanzibar/Tanzania	10	12	7	20	10	8.7
Zanzibar/Tanzania	1520	1960	1320	1880	1890	1930
Zanzibar/Tanzania	4740	6200	3740	7350	6360	5230
Zanzibar/Tanzania	461	518	398	591	513	640
Zanzibar/Tanzania	19	24	17	21	24	25
Zanzibar/Tanzania	39	34	22	39	43	49
Zanzibar/Tanzania	56	79	49	67	74	99
Zanzibar/Tanzania	384	522	374	510	450	541

## Sheet: hrp2 triplicates
Well	hrp2 copies/uL DNA	tRNA_hrp2	hrp2_accepted droplets	hrp2_Droplet cout	tRNA_hrp2_Droplet cout		hrp2 copies/uL DNA	tRNA_hrp2	hrp2_accepted droplets	hrp2_Droplet cout	tRNA_hrp2_Droplet cout		hrp2 copies/uL DNA	tRNA_hrp2	hrp2_accepted droplets	hrp2_Droplet cout	tRNA_hrp2_Droplet cout
D02	0	0	11031	0	0		0	0	10997	0	0		0	0	13511	0	0
G04	0	0	11808	0	0		0	0	11862	0	0		1	0	11712	1	0
H07	0	0	16245	0	0		1.3	0	8748	1	0		0	0.8	14422	0	1
F04	0.9	0	12734	1	0		0	0	7136	0	0		0	0	19866	0	0
G03	0	0.8	14554	0	1		1	0	12347	1	0		0	0	16397	0	0
F06	5.7	5.7	14531	7	7		0	0	12392	0	0		0	0	11669	0	0
E01	53	55	11317	51	53		0	0	11619	0	0		0	0	14520	0	0
F05	0	0	1328	0	0		9	14	12063	9	14		16	16	14289	19	19
H01	3.5	1.4	16700	5	2		3.4	1.1	10372	3	1		3.3	1.7	14181	4	2
A02	2.3	7	10256	2	6		0	1.2	9773	0	1		3	5	4444	1	2
C12	3.8	19	12501	4	20		4	4	5727	2	2		3.8	0.8	15481	5	1
G03	8	6.5	12595	9	7		3.9	0	15155	5	0		9	5.1	13819	10	6
G11	10	3.4	13865	12	4		1.3	0	8721	1	0		4.5	5.1	18434	7	8
B06	9	2	11682	9	2		5	5	9288	4	4		3.5	3.5	13290	4	4
H06	2	3	11714	2	3		1.7	2.6	13510	2	3		3.1	2.5	18894	4	3
H12	2.2	3.3	10766	2	3		2.6	2.6	13777	3	3		8	2.6	13628	9	3
H07	1.2	1.8	19144	2	3		178	176	13559	201	198		210	195	15900	277	257
F11	1.4	2.9	16442	2	4		4.9	5.7	14468	6	7		4.8	3.4	17333	7	5
D08	1.6	4	14797	2	5		6.7	2.5	13951	8	3		3.7	3.7	16009	5	5
G10	2.1	6	11144	2	6		4.1	6	11470	4	6		3.1	3.9	14944	4	5
H04	4.2	4.2	11176	4	4		4	6	6355	2	3		5.3	6.9	15460	7	9
F06	3.7	5.5	12736	4	6		3.8	1.9	12472	4	2		1.7	5.9	13915	2	7
G08	6	13	8028	4	9		4	6	6355	2	3		5.3	6.9	15460	7	9
C01	3.5	2.1	16626	5	3		7	2.5	14139	9	3		8	3.3	14366	10	4
F12	6	6	9914	5	5		7	7	12991	9	8		4	9	14885	5	12
A09	6	10	9094	5	8		5.3	5.3	11052	7	5		1.9	10	6145	1	5
A01	4.1	7.4	14229	5	9		7	14	10450	6	12		7	9	13376	8	10
H10	7	7	10494	6	6		11	3.2	11016	10	3		5	6	11693	5	6
A02	5.5	5.5	12834	6	6		10	3.2	10912	9	3		9	7	13210	10	8
F01	6.2	9	13296	6	9		4.3	4.3	11045	4	4		3	7	11610	3	7
A01	6	10	11803	6	10		12	9	13434	14	10		10	16	10862	9	15
A12	7	10	11584	7	10		8	6.2	13263	8	6		8	4.8	14632	10	6
B01	7	10	11615	7	10		5.5	3.7	12761	6	4		11	12	13228	12	13
H09	6.1	2.3	15499	8	3		4.7	3.8	12505	5	4		6.1	2.7	17345	9	4
A06	8	2.9	12241	8	3		3.2	3.2	11069	3	3		5.9	3.9	12049	6	4
F11	9	5.3	11033	8	5		6.6	6.6	14245	6	8		4.1	7.4	14373	5	9
C09	8	6	11270	8	6		7	7	11927	9	7		0.8	3.9	15162	1	5
A10	5.5	10	16964	8	14		6.1	4.4	13406	7	5		5.8	5.8	14180	7	7
B02	7	12	13321	8	14		8	3.8	12507	9	4		10	8	14010	12	9
H11	9	2.9	12371	9	3		10	10	13841	12	12		5.6	10	14825	7	12
D12	10	7	10404	9	6		10	10	13335	7	11		6.1	8	15416	8	11
H03	9	7	11739	9	7		12	11	13036	13	12		5.1	9	13816	6	11
E03	9	8	12512	9	8		8	10	14025	10	12		5.9	14	13853	7	17
D02	9	9	12410	9	9		3.8	12	12488	4	13		6	4.2	11313	6	4
G02	9	9	11864	9	9		6.2	8	13320	7	9		6.3	6.3	13077	7	7
C11	7.4	11	14269	9	13		9	5.9	13917	11	7		6	9.4	17610	9	14
C01	9	3.6	12902	10	4		7	5.5	10774	6	5		5.2	1.5	15719	7	2
E03	9	3.7	12619	10	4		3.1	3.9	15054	4	5		6.3	6.3	13171	7	7
F07	12	6	9583	10	5		17	7	13495	20	8		8	11	13502	9	13
A03	10	6	11410	10	6		7	12	11154	7	11		6.8	14	13797	8	16
F05	8	6.4	14786	10	8		3.5	5.2	13485	4	6		5	8	11692	5	8
C03	10	8	12659	11	9		8	8	12537	9	8		4.8	8	12192	5	8
C04	10	9	13590	11	10		7	7	13054	8	8		9	9	12426	9	9
A03	10	8	13568	12	9		5.6	5.6	12690	6	6		7.1	6.3	14991	9	8
B08	10	9	14404	12	11		10	5.6	14809	13	7		15	11	16216	21	15
G05	10	11	14613	13	14		11	8	12221	11	8		10	12	16949	14	17
D04	12	9	13752	14	11		8	9	13885	9	11		5	8.6	16345	7	12
F05	11	9	14958	14	11		9	5.8	14295	11	7		6	12	17781	9	18
A07	10	14	17308	15	21		12	6	9534	10	5		10	2.4	14585	12	3
B07	12	19	15162	15	24		29	32	12905	32	35		31	38	15968	42	52
A04	13	11	14718	16	14		10	17	11852	10	17		15	10	12173	16	10
B04	21	16	10422	19	14		17	17	9238	17	13		14	18	11538	14	18
G05	15	14	14805	19	18		10	13	14646	13	16		7	15	12598	8	16
G11	21	21	12022	21	21		30	30	14574	27	37		23	27	14104	28	32
B03	20	21	12276	21	22		23	23	11507	20	22		10	23	14634	13	28
H06	17	18	14828	21	23		22	20	12886	24	22		8	10	12381	8	11
A07	22	14	11575	22	14		8	8	12504	19	9		20	17	15719	27	23
G12	30	25	9078	23	19		43	43	11083	28	40		30	35	15261	39	45
G01	23	22	11877	23	22		14	14	11236	13	13		9	19	13810	10	22
A05	19	21	14141	23	25		19	25	11553	19	25		22	27	13630	26	31
G08	19	23	14098	23	27		19	19	4982	8	8		26	21	16158	35	29
E05	32	28	9528	26	23		31	24	11499	30	23		31	23	15792	41	31
B12	34	34	9073	26	26		44	27	13511	50	31		39	42	15308	51	54
H08	36	16	9410	28	12		26	33	10395	22	28		17	17	14585	21	21
D03	23	19	14618	28	23		15	9	12667	16	10		17	18	15657	23	24
F04	25	15	13930	29	18		22	16	11386	21	15		15	14	17588	22	21
H05	41	40	8531	29	28		32	28	5835	16	14		27	28	15150	35	36
D10	23	13	15714	31	17		26	22	13223	29	25		26	19	17499	39	28
B09	26	28	14764	33	35		29	25	10983	27	23		34	28	16144	46	39
E06	25	23	15970	34	31		28	18	10957	26	17		15	19	9389	12	15
E11	43	66	9521	35	53		57	57	14365	68	70		33	4.1	11360	32	4
H11	29	37	14457	36	46		32	35	12842	35	38		31	25	17347	46	37
D09	36	22	12258	37	23		49	49	12835	38	53		56	47	15255	72	61
G09	28	27	15910	38	36		32	20	13412	36	23		26	24	16654	37	34
G02	31	33	14270	38	40		26	34	8762	19	25		23	24	14104	28	29
E05	27	27	17189	39	39		22	20	19294	36	33		23	18	23989	46	37
D07	26	32	17599	39	48		17	18	9150	13	14		20	12	20969	36	21
D07	25	13	18897	40	21		21	18	16885	30	26		26	24	15480	34	31
C11	46	42	10687	42	38		52	52	16563	43	73		33	37	14666	41	46
E09	44	42	11428	42	40		30	30	9931	29	25		32	35	15216	41	45
B07	40	40	12648	42	42		41	41	12968	59	45		43	36	13684	50	42
G09	41	46	12042	42	47		33	39	11922	33	39		45	24	13810	53	28
A08	65	58	8126	44	39		47	47	13746	49	55		48	53	15320	63	69
C09	33	26	16080	45	35		32	23	11733	32	23		35	35	17288	51	51
A05	70	40	7973	46	26		40	40	10133	46	34		57	39	14575	70	47
B05	41	33	13072	46	37		28	33	16207	39	45		42	38	15873	57	51
F08	59	51	9396	46	40		46	58	11951	46	58		39	49	15805	52	66
G03	46	31	12026	47	32		51	44	11173	48	42		30	29	11938	30	29
F07	33	29	16915	48	41		30	23	9755	25	19		28	27	14245	34	33
C04	42	42	14848	53	53		45	35	13316	51	39		48	36	16892	68	51
G04	67	79	9564	54	64		53	64	10204	45	54		47	64	13607	54	74
C06	57	48	13531	63	53		48	53	12645	52	57		42	44	11144	40	42
G06	56	53	13230	63	59		38	42	11424	37	41		38	35	14033	45	42
D11	66	75	11685	65	74		70	70	14511	51	86		60	55	16592	84	78
D03	66	45	12021	67	46		39	35	19110	64	57		34	31	18844	54	49
D04	60	49	13369	68	56		68	55	12837	74	60		57	53	11692	57	53
E02	53	42	15494	69	55		48	30	13038	53	33		42	45	13256	47	51
G05	88	75	9291	69	59		75	59	10639	67	52		44	54	15864	59	73
F03	85	75	9624	69	61		93	77	13407	103	85		88	88	11282	83	83
E10	81	106	10588	72	94		81	81	11142	59	75		58	81	14809	73	102
H09	76	87	11454	74	84		86	98	11019	78	89		68	70	14949	86	89
A11	118	127	7525	75	81		134	134	15593	126	176		94	117	11237	89	111
H02	67	75	13938	79	88		62	76	11374	60	73		83	84	11721	82	83
A03	78	99	12142	80	102		62	62	6891	31	36		78	88	14801	98	110
A12	91	107	11201	86	101		98	98	13444	101	112		91	91	13980	107	107
B04	80	67	12923	87	72		85	62	12239	88	64		81	68	12078	80	67
G06	77	63	13581	88	71		69	63	12643	73	66		59	61	10832	54	56
B01	64	55	16267	88	76		56	58	9404	45	46		56	58	14938	71	73
G12	112	105	9527	89	84		117	107	14406	141	130		90	96	16604	127	135
F09	97	93	11174	91	87		89	89	9775	84	74		69	83	15150	88	106
B11	103	120	10536	91	106		127	127	13591	127	144		99	114	15969	134	154
E04	85	88	13190	94	97		101	99	12974	110	108		86	76	12692	92	82
B05	69	56	16493	96	78		59	60	14519	73	74		50	64	15224	65	83
D09	84	83	14530	103	102		83	67	12458	88	71		79	64	16785	113	91
G07	133	114	10195	114	97		95	88	14241	113	104		94	77	16843	132	108
F04	102	67	13642	117	77		88	86	11393	84	82		78	69	13158	87	77
F10	127	157	11525	123	152		171	171	11493	112	163		123	137	14685	149	166
C10	113	128	14031	132	150		94	86	12427	99	91		90	122	17543	133	181
B06	110	142	14298	133	172		109	121	13077	120	133		120	112	11419	113	105
E11	112	120	14723	138	149		109	128	11838	109	128		82	108	17233	118	156
H08	138	168	12202	140	171		179	161	6832	102	92		157	159	17022	224	226
B11	115	113	14700	142	140		93	83	11928	94	84		101	104	16894	142	147
G04	132	154	13420	150	174		136	129	13624	157	148		155	162	15877	207	216
H07	174	146	10818	158	132		130	134	13787	150	155		116	99	16117	158	135
F02	129	108	14829	160	133		115	108	11748	114	107		79	79	13526	90	90
C06	176	196	11403	165	184		179	179	12789	160	190		137	148	14638	165	178
C12	154	114	12983	167	123		134	111	15756	175	144		122	129	16456	170	180
H02	171	183	12382	178	190		149	142	11867	149	142		145	140	11035	133	129
C02	160	152	13555	182	173		158	157	11907	155	154		146	146	13500	166	165
A06	161	152	13906	184	173		164	158	13293	183	176		153	161	12412	158	167
H04	91	81	24186	185	165		103	126	15318	129	158		70	84	19671	116	140
A07	137	130	16050	186	177		141	139	10737	128	126		119	124	15845	156	163
F02	100	96	22164	186	178		111	97	14915	138	120		118	136	12170	120	139
D06	147	131	15238	188	168		130	149	12293	132	152		133	122	13743	152	139
B12	222	225	10238	188	191		219	219	12382	195	225		215	200	15486	272	252
D05	187	181	12948	202	196		158	150	13571	179	170		160	150	16421	219	205
D02	331	392	7963	211	251		359	421	11672	343	402		352	324	15604	448	412
D12	214	231	12178	217	234		218	209	15140	275	263		174	192	11987	175	193
B05	286	236	9311	222	183		192	192	11973	222	192		195	221	14972	243	276
B07	178	169	15342	227	215		147	198	9657	117	158		143	155	15871	189	205
E03	180	192	15043	229	244		154	159	12616	163	168		122	158	13339	137	177
D10	210	151	13169	230	165		136	136	13397	193	154		140	115	15542	182	149
C05	203	201	13843	232	229		197	183	12224	195	181		162	183	17146	231	262
B06	193	172	14547	236	210		167	153	12115	170	156		146	152	14497	177	184
C05	470	430	6327	240	220		483	483	12536	437	489		467	457	13657	513	502
D05	212	210	15149	267	264		242	220	13073	264	240		223	202	12042	222	201
B02	221	175	14480	268	212		206	211	11647	196	201		216	212	11541	204	200
C05	244	219	13473	271	243		95	88	14241	113	104		94	77	16843	132	108
C08	440	404	7813	278	257		387	387	10666	293	332		377	371	15929	484	475
B10	373	359	9188	278	267		309	309	12165	331	311		323	328	14822	391	397
F03	272	277	12530	283	289		264	278	13565	295	311		261	281	13841	293	316
D06	222	189	15778	290	247		195	199	11461	183	187		232	207	12148	234	209
C06	248	221	14998	307	273		262	230	12571	268	234		209	205	14113	245	241
C03	328	322	11460	310	304		359	396	11697	341	376		347	365	14282	397	418
E01	231	224	16405	311	301		257	248	11104	233	225		214	227	12470	221	234
H05	284	304	13612	314	336		282	272	11060	259	250		273	303	15441	345	384
F09	228	230	16780	318	321		261	246	13432	287	270		214	207	15778	281	271
B08	500	500	8059	326	323		369	369	9736	295	288		384	369	14858	459	441
G06	408	383	9822	328	308		362	383	13878	409	432		322	287	12632	330	293
E07	363	303	12320	361	300		363	331	13396	396	361		333	288	16671	454	392
D06	342	316	13187	365	337		263	263	12480	315	265		267	232	9170	201	174
E08	660	600	7175	366	333		500	500	12046	513	479		502	523	15097	601	627
C02	379	447	12368	383	452		409	414	10130	333	337		393	396	12435	395	398
F06	380	410	13262	404	437		348	384	13189	374	413		351	350	14519	416	414
H04	498	363	10134	411	299		297	302	11125	269	274		283	240	14220	329	278
C02	331	350	15437	420	444		246	277	10341	210	237		301	260	14270	351	302
F03	358	337	14732	422	397		318	302	12434	328	311		268	287	14943	321	345
E06	360	359	14512	422	421		347	302	14261	410	356		337	318	14463	392	370
H01	371	347	14560	443	414		308	287	8828	225	210		446	404	11660	425	385
G07	310	244	17533	451	355		270	259	9511	213	204		237	237	14053	272	272
C08	484	460	13031	506	481		461	444	11253	413	398		472	504	15695	591	632
B09	415	396	14975	508	485		317	317	11307	295	292		398	382	14606	473	454
E08	425	459	14909	508	550		405	398	12713	417	410		366	382	14122	418	436
F01	375	357	16713	510	485		349	372	10323	292	311		287	266	13883	325	300
B10	405	364	15750	522	469		307	307	12178	303	303		291	312	16448	389	418
E02	400	411	15952	525	540		326	333	9376	244	250		365	381	13736	406	424
H12	535	595	13208	545	609		880	1010	12057	803	924		655	780	13558	680	820
E02	366	322	18919	550	482		303	303	18500	455	455		337	337	17679	484	484
G01	422	379	17016	575	516		433	441	11253	395	402		369	356	13252	400	386
F12	625	574	12337	604	553		530	510	13897	582	560		583	564	16242	745	720
D01	629	608	12614	633	611		607	593	12187	587	573		548	569	13411	583	606
D05	990	780	8434	638	497		670	690	11263	588	606		564	410	14654	659	475
H02	590	602	13702	642	656		710	700	10492	597	590		626	611	12082	595	580
C04	515	524	15856	653	665		457	440	11908	439	422		484	486	15129	593	595
E04	592	529	13966	662	591		537	562	14169	607	636		527	556	16659	702	741
A10	1510	1360	6200	662	592		1440	1440	12640	1223	1284		1260	1270	15656	1418	1425
D04	850	830	10352	674	659		740	740	10654	610	611		605	648	13333	633	680
E12	920	1080	9999	689	819		1350	1350	11941	995	1174		1090	1260	13693	1102	1284
C07	682	609	12849	691	615		321	321	12732	334	330		384	340	15824	490	433
E07	550	571	15900	691	718		690	740	9246	490	531		465	549	14619	539	639
D07	810	800	11040	700	687		810	810	13085	787	826		622	595	16701	811	775
D08	1570	1410	6503	708	632		1100	1100	11766	1004	938		1060	1080	15793	1240	1267
E10	707	718	13431	744	756		603	661	12334	587	645		658	670	14998	773	787
A09	672	645	14317	755	724		593	594	14247	659	661		630	661	16482	804	845
D03	657	658	14616	755	756		512	620	10779	437	527		508	510	14114	576	579
C03	642	577	15750	795	712		533	528	12469	535	530		570	630	14909	668	740
F02	800	780	12826	795	773		790	840	9362	571	609		800	840	12920	787	832
G01	780	750	13206	802	768		730	830	10787	609	702		660	700	11115	571	606
F01	731	686	14733	835	783		660	646	12073	635	621		650	690	9781	498	529
F08	930	960	11787	841	875		940	910	14119	990	953		920	940	15248	1052	1083
E01	740	740	14904	850	850		680	720	13271	695	736		686	711	13876	730	758
B02	1040	1030	11152	871	859		1030	1070	10718	830	867		960	950	10460	767	754
B01	850	770	13128	880	792		730	740	11481	647	654		608	664	13452	637	697
A04	930	900	13471	941	919		960	990	13282	948	975		950	890	13115	947	891
B03	1010	1020	12985	989	996		1090	940	11519	942	807		1030	1020	13298	1020	1004
E05	1000	1010	13268	1000	1004		940	990	11622	803	854		860	900	13052	862	902
G07	829	778	15735	1014	950		720	730	12792	727	737		704	708	17337	951	957
C07	960	970	14559	1044	1053		990	940	8457	631	602		930	970	14270	982	1025
C10	1380	1180	10810	1063	902		1040	1040	12423	1025	962		1140	1140	16798	1400	1402
A04	1660	1820	10076	1130	1243		1240	1240	7603	665	686		1270	1400	14387	1293	1442
H03	1390	1260	11775	1184	1071		1370	1320	12319	1213	1166		1020	1060	10563	803	829
H05	1030	1070	16016	1234	1282		940	890	15258	1088	1027		1040	1040	16062	1224	1220
A02	1330	1380	13335	1274	1324		1460	1460	10484	1015	1100		1420	1460	12209	1228	1267
D01	1230	1250	14445	1281	1306		1030	1020	8168	619	614		1100	1020	14427	1168	1079
E12	1550	1510	11926	1287	1252		1620	1690	14662	1648	1717		1300	1330	14724	1380	1420
H03	1450	1490	12877	1296	1334		2680	2720	13289	2188	2224		1830	1890	9793	1221	1260
E06	1190	1050	14854	1306	1141		940	861	17039	1229	1122		897	829	20424	1392	1283
B04	1250	1110	14182	1310	1158		1010	1050	13034	985	1026		1210	1130	16141	1416	1315
G10	1270	1260	16322	1485	1480		1100	1080	12336	1007	984		1150	1160	16949	1423	1438
G02	1290	1410	16173	1485	1628		1260	1370	13702	1244	1357		1040	1160	13919	1060	1193
A06	1480	1520	14707	1521	1571		1440	1430	11116	1123	1113		1350	1420	9500	905	954
E07	1550	1590	14727	1562	1604		1450	1380	11436	1184	1125		1340	1330	15088	1448	1437
F10	1460	1450	15342	1565	1548		1590	1550	14519	1613	1572		1520	1460	16782	1818	1736
A08	1720	1640	14670	1756	1662		1790	1780	10373	1270	1266		1620	1590	14033	1593	1568
D11	1840	1800	14640	1827	1782		1820	1800	11551	1409	1391		1820	1900	15534	1871	1961
D01	1860	1700	14678	1861	1693		1540	1540	12807	1353	1362		1730	1520	15506	1847	1598
A01	2900	2850	10831	1861	1826		2900	2950	12749	2136	2172		2390	2350	13810	2084	2048
H10	2120	2130	13806	1898	1911		2480	2490	13915	2147	2164		2000	2080	16477	2145	2236
A05	2370	2340	12954	1957	1935		1930	2100	12448	1587	1736		2210	2310	13922	1950	2042
H06	1730	1730	16813	1997	2002		1540	1520	18740	2038	2002		1410	1360	20444	2022	1942
H01	2670	2680	12906	2073	2083		2510	2480	12005	1840	1821		2470	2570	11367	1730	1804
A11	2570	2380	13652	2194	2016		2340	2360	13602	1984	1999		2160	2210	16327	2290	2349
C01	2600	2590	14410	2301	2294		2330	2600	11320	1618	1829		2240	2350	11988	1680	1774
B03	3480	3210	12403	2406	2194		2970	2890	12221	2178	2107		3030	3030	12958	2292	2291
E04	4950	4300	10135	2455	2077		4250	3610	10710	2401	1981		3270	2900	12347	2317	2019
F07	2610	2530	17728	2854	2749		2550	2660	13532	2145	2241		2390	2400	15761	2393	2409
E09	4440	4470	14789	3261	3287		4690	4900	10882	2377	2509		4100	4290	13093	2675	2819
C07	5470	5360	15018	3603	3510		4850	4980	12333	2719	2812		4820	4750	16903	3782	3712

## Sheet: hrp3 triplicates
Well	hrp3 copies/uL DNA	tRNA_hrp3	hrp3_accepted droplets	hrp3_Droplet cout	tRNA_hrp3_Droplet cout		hrp3 copies/uL DNA	tRNA_hrp3	hrp3_accepted droplets	hrp3_Droplet cout	tRNA_hrp3_Droplet cout		hrp3 copies/uL DNA	tRNA_hrp3	hrp3_accepted droplets	hrp3_Droplet cout	tRNA_hrp3_Droplet cout
A01	9	5.5	14910	11	7		4.9	5.7	6	7	14518		11	5.4	10878	10	5
A02	1670	1550	7294	929	864		2070	1960	1999	1902	12743		1940	1900	10872	1598	1567
A03	77	92	13863	90	108		62	82	76	100	14422		183	211	14261	219	252
A04	1410	1350	11345	1271	1217		1270	1330	1116	1167	11099		1200	1270	11375	1088	1148
A05	68	37	10776	62	34		48	58	60	72	14765		53	53	13850	62	62
A06	9	8	13336	10	9		3.9	6.2	5	8	15089		3.2	6	10872	3	6
A07	14	22	10654	13	20		14	14	14	14	12151		16	11	15666	21	14
A08	44	43	12455	47	45		31	29	33	31	12439		24	36	12555	26	38
A09	1.8	5.3	13427	2	6		10	6	13	8	15629		3.5	6	13638	4	7
A10	980	590	2905	232	143		1000	880	1187	1052	14685		950	890	12936	993	934
A11	83	91	13597	96	105		72	98	99	135	16199		79	92	15000	99	115
A12	103	98	12091	105	100		100	111	120	133	14198		120	138	12238	123	142
B01	15	15	15637	20	20		11	16	15	22	15876		8	12	11250	8	11
B02	1060	1050	12857	1082	1069		1010	950	1042	980	12953		980	950	13225	1052	1015
B03	23	22	15263	30	29		19	26	23	32	14264		31	25	14318	38	30
B04	30	41	12364	32	43		28	28	28	28	11801		20	12	13227	22	12
B05	222	194	15136	282	247		198	215	244	264	14601		224	222	13896	261	259
B06	8	5.1	13823	9	6		6.6	6.6	8	8	14277		7	4.1	11379	7	4
B07	41	34	11030	38	32		45	42	53	50	14005		34	51	15459	44	66
B08	434	438	12033	435	439		580	567	562	550	11771		592	530	12803	621	557
B09	355	324	14768	439	401		351	309	455	401	15633		326	296	14327	392	356
B10	430	460	3282	116	126		358	394	443	487	14821		329	320	12231	334	325
B11	83	104	13549	95	119		96	120	129	161	15915		88	106	14669	109	132
B12	188	194	12310	195	201		201	207	239	246	14187		167	176	12242	173	182
C01	3350	2680	15683	3781	3093		3110	2670	3228	2807	14374		3030	2840	10175	2025	1898
C02	547	550	11920	539	541		499	488	517	505	12659		486	492	13061	527	533
C03	483	519	15197	607	652		473	549	607	703	15644		444	485	14672	542	590
C04	1010	910	11129	903	820		670	720	586	634	10792		582	638	12644	595	652
C05	474	438	15864	625	578		427	437	553	565	15637		383	380	13098	417	413
C06	217	193	13762	251	223		140	153	149	163	12619		176	172	11390	167	163
C07	407	359	10884	370	327		370	354	413	395	13502		363	342	15683	467	440
C08	650	530	13665	733	600		629	558	662	589	12761		566	572	12481	584	590
C09	3.4	2.5	13954	4	3		3.7	4.4	5	6	15976		2.4	2.4	14443	3	3
C10	1050	760	4739	406	295		1040	990	1135	1089	13474		1050	960	13186	1104	1017
C11	26	32	13836	31	38		30	40	40	53	15798		36	28	16388	50	39
C12	6	3.1	11318	6	3		4.3	4.3	5	5	13625		1.8	3.5	13325	2	4
D01	73	68	15706	97	90		59	73	82	102	16378		69	74	10142	58	63
D02	0	0.9	12826	0	1		0	0.9	0	1	13704		0	0.8	14434	0	1
D03	890	840	11495	830	776		699	798	877	1002	15727		657	820	14466	767	955
D04	980	1010	10742	856	882		910	950	843	880	11666		950	1000	13345	1010	1058
D05	457	388	16669	632	538		520	430	637	528	14878		369	317	12842	391	335
D06	578	548	12336	589	559		575	532	628	582	13185		271	259	10457	215	205
D07	890	770	10410	752	655		1030	940	1063	965	12801		673	633	15574	862	812
D08	810	750	12612	839	774		790	770	788	769	12257		830	790	14224	963	920
D09	21	22	13601	24	25		22	21	30	28	16020		13	17	13872	15	20
D10	129	126	3851	41	40		117	84	130	93	13368		101	94	13802	115	107
D11	0	0	15122	0	0		0	0	0	0	15990		0	0.8	15610	0	1
D12	4.9	9	14483	6	11		9	8	10	9	12621		6.2	9	13300	7	10
E01	0.8	2.4	14688	1	3		2.2	3.7	3	5	16075		1	4.1	11501	1	4
E02	671	661	13050	711	701		653	696	692	737	13010		628	637	13229	680	689
E03	13	5.3	13253	15	6		13	14	16	18	14909		13	19	14099	16	23
E04	3840	2690	11072	3017	2199		3740	2730	2973	2216	11638		3440	2500	11786	2907	2176
E05	26	33	15574	34	44		33	34	42	44	15223		30	24	14272	36	29
E06	1340	1130	19182	2034	1726		930	820	884	786	11778		860	880	10105	692	712
E07	208	198	12100	212	202		273	318	334	389	14577		301	265	15326	381	335
E08	492	459	14170	579	541		483	446	495	458	12334		445	430	12587	456	441
E09	36	34	14426	44	42		20	33	24	40	14109		30	25	14681	38	31
E10	46	46	3881	15	15		54	61	56	64	12685		64	72	12235	65	74
E11	47	54	14733	59	68		35	49	48	66	15932		40	43	15345	52	56
E12	990	1000	12489	1005	1013		1010	1060	870	911	10677		1010	960	13777	1124	1073
F01	9	9	13790	11	10		10	4.7	13	6	14990		4.4	5.4	10807	4	5
F02	970	950	13077	1012	998		890	1010	776	883	10808		940	930	12689	960	944
F03	339	331	11350	321	314		343	351	413	423	14424		235	294	12845	254	317
F04	7600	3760	1404	555	271		9840	2190	2134	533	4037		1470	1130	14717	1720	1344
F05	8.9	8.2	17153	13	12		9	11	12	15	15500		13	10	14326	16	12
F06	2.6	2.6	13384	3	3		2.6	1.7	3	2	13449		4.9	2.9	11982	5	3
F07	3.1	5.2	11304	2	4		11	9	11	9	12773		11	2.9	16160	15	4
F08	30	33	14642	37	41		30	48	32	51	12849		28	30	14309	34	37
F09	81	80	14780	102	100		68	82	89	108	15458		78	79	14081	93	94
F10	111	146	5839	55	72		105	194	106	196	11964		83	101	13071	91	111
F11	2.9	3.6	16185	4	5		5.1	7.9	7	11	16285		3.2	2.4	14737	4	3
F12	14	9	12814	15	10		18	14	19	15	12470		18	22	12417	19	23
G01	810	777	14834	970	936		800	840	933	970	14640		760	790	10632	653	684
G02	43	38	11238	41	36		34	31	35	32	12203		31	31	13475	36	35
G03	36	51	11588	35	50		46	58	55	70	14949		39	51	14385	47	62
G04	96	93	12623	103	99		130	126	137	132	12531		83	77	4140	29	27
G05	58	38	15782	77	51		50	45	65	59	15404		51	41	14201	62	50
G06	415	360	14591	505	439		372	354	438	417	14151		374	354	7989	245	232
G07	107	97	11411	103	94		84	77	98	90	13785		82	110	15549	108	145
G08	4.4	8.1	15896	6	11		6	12	6	12	11437		13	13	11202	11	11
G09	32	38	14530	40	47		31	24	43	33	16331		32	24	14537	39	30
G10	11	0	3246	3	0		5.6	1.6	7	2	14758		6.2	8	13226	6	8
G11	12	16	15080	16	20		11	14	15	20	16409		16	15	13694	18	17
G12	32	42	12989	35	46		35	28	42	34	14302		38	36	14083	46	43
H01	414	360	14881	514	448		360	347	473	455	15882		345	365	10335	296	313
H02	601	613	12287	603	615		600	610	534	546	11026		637	640	12459	653	656
H03	1450	1330	10125	1147	1055		1430	1340	1466	1381	13140		1490	1360	12142	1423	1312
H04	158	154	12422	166	162		179	143	155	124	10415		184	152	12228	188	155
H05	23	18	17219	33	27		23	16	29	20	14791		15	19	12924	17	21
H06	5.2	2.6	13661	6	3		4.1	0.8	5	1	14434		3	1	11617	3	1
H07	153	159	9588	124	129		201	199	237	235	14041		151	171	8679	72	86
H08	23	21	13333	26	24		18	34	18	34	11634		31	37	8658	23	27
H09	81	75	14473	99	92		71	81	87	99	14405		80	67	14157	96	80
H10	0	0	3247	0	0		2.5	7.5	3	9	14212		4.8	5.7	14561	6	7
H11	8	9	14754	10	11		7.3	14	10	19	16132		9	10	12828	10	11
H12	491	594	12384	506	610		527	653	580	715	13260		397	402	8368	275	278
