# Supplementary figures and images for: High-throughput Plasmodium falciparum hrp2 and hrp3 gene deletion typing by digital PCR to monitor malaria rapid diagnostic test efficacy
Source: eLife journal article supplement (doi:10.7554/elife.72083), 2022-06-07

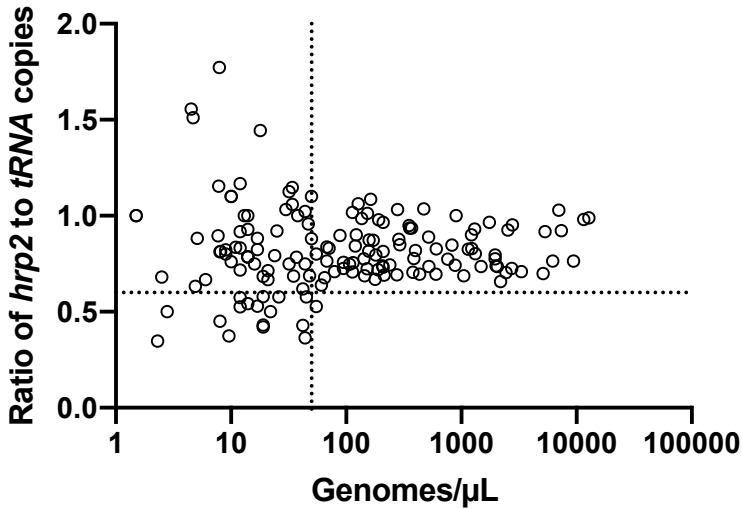

Supplement: supp [file elife-72083-supp-v1.zip]

A: Wild type, medium density

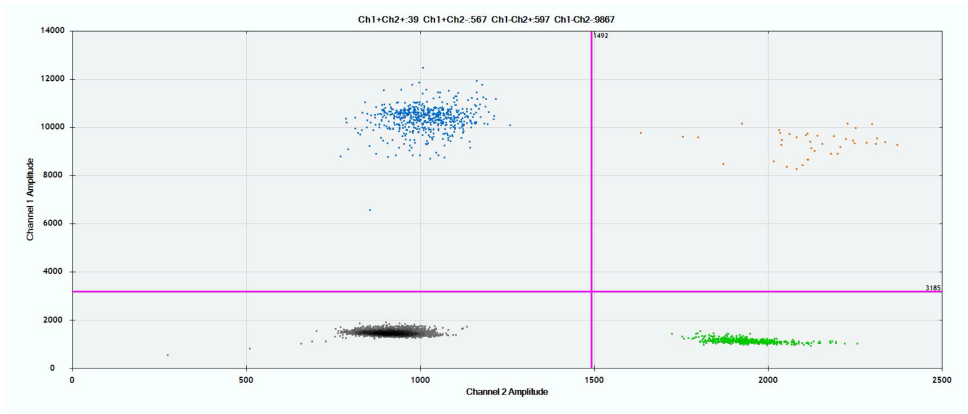

B: Wild type, low density

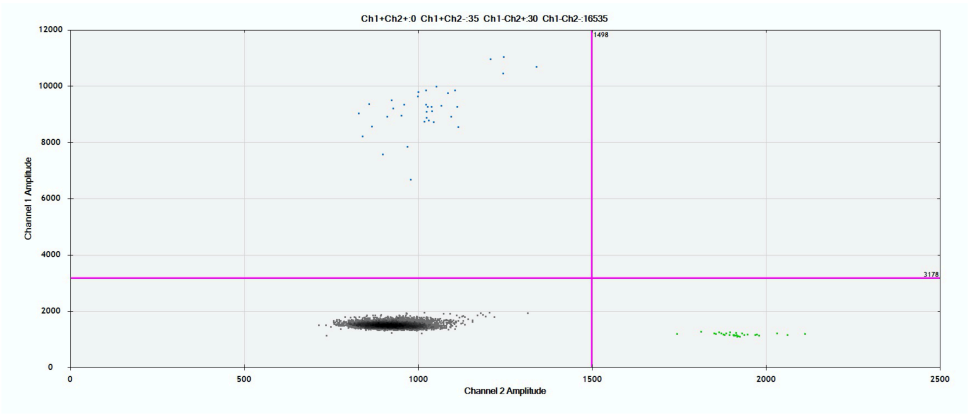

C: *hrp2* exon 1 deletion

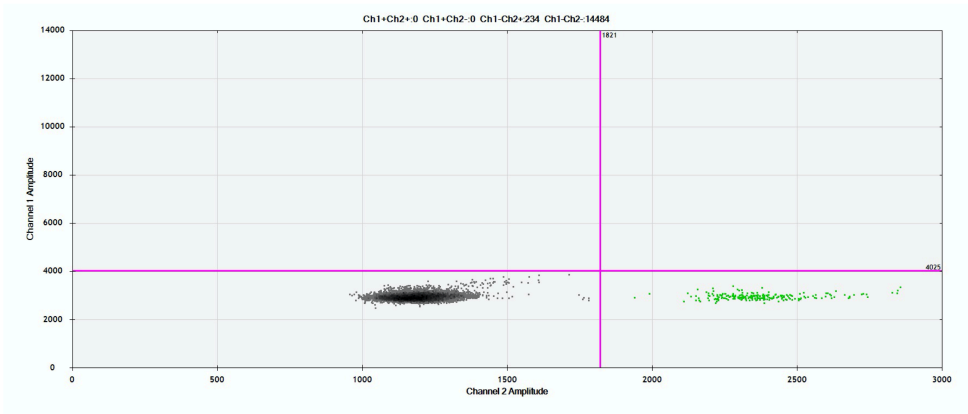

Supplement: supp [file elife-72083-supp-v1.zip]

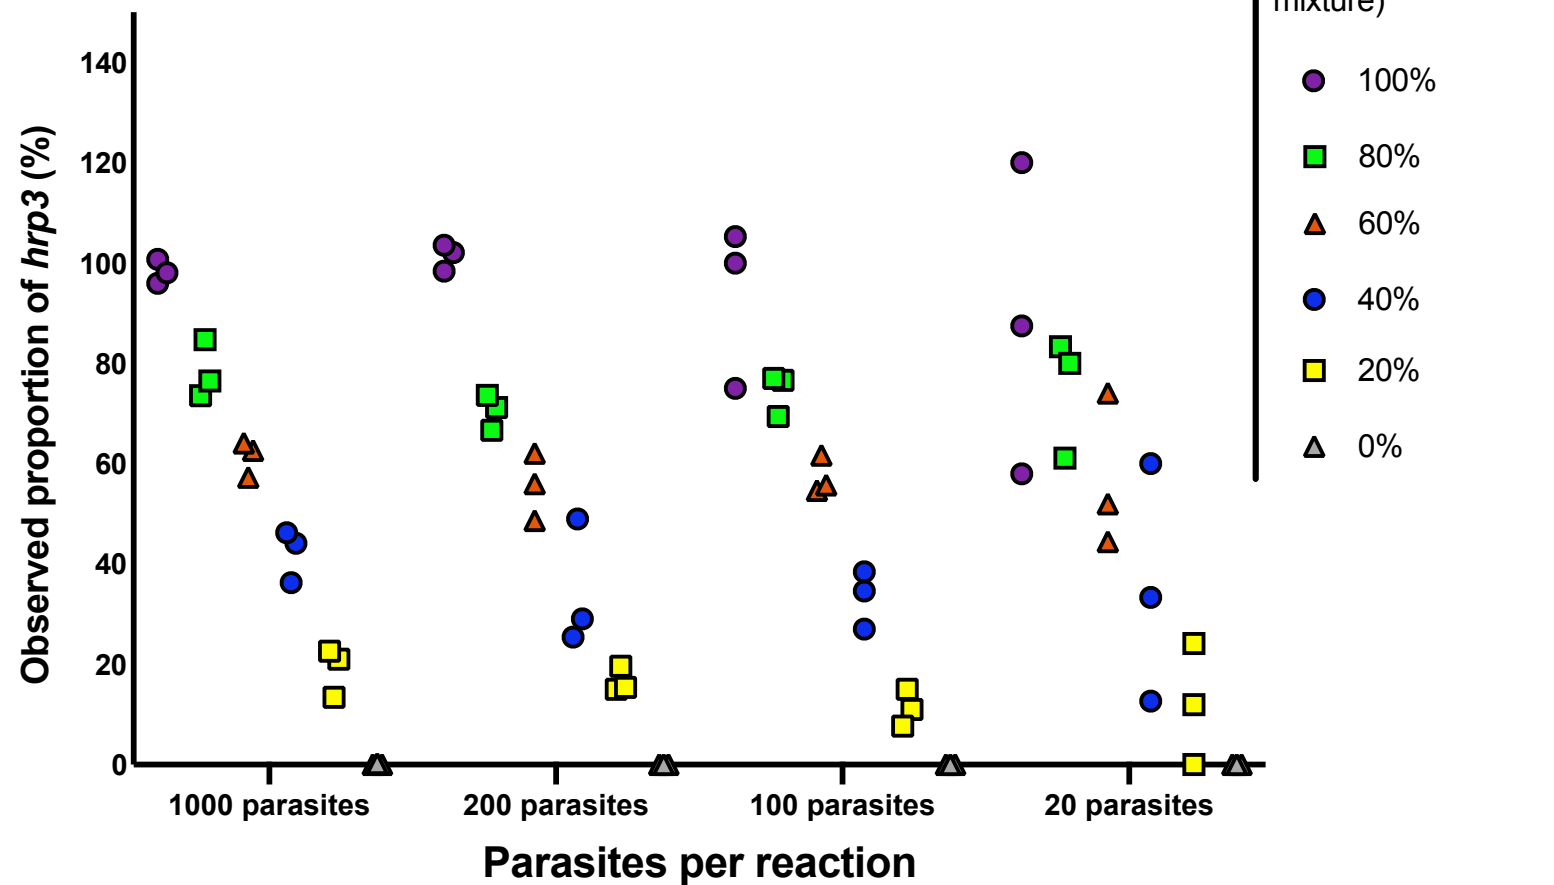

Supplement: supp [file elife-72083-supp-v1.zip]

## A: Wild type, medium density

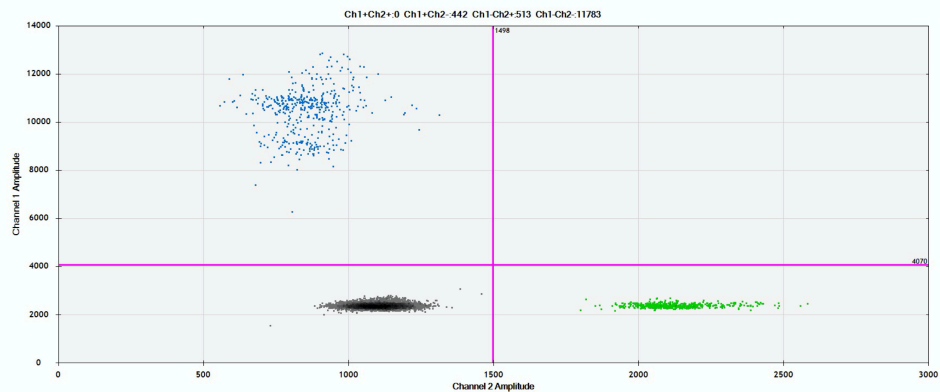

## B: Wild type, low density

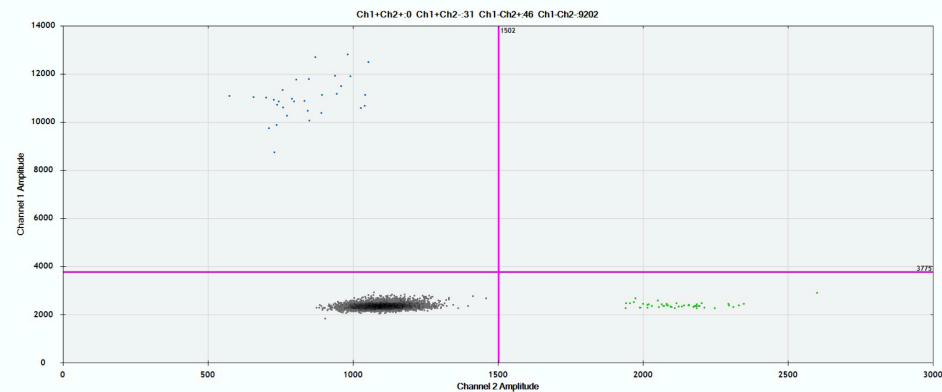

## C: *hrp3* deletion

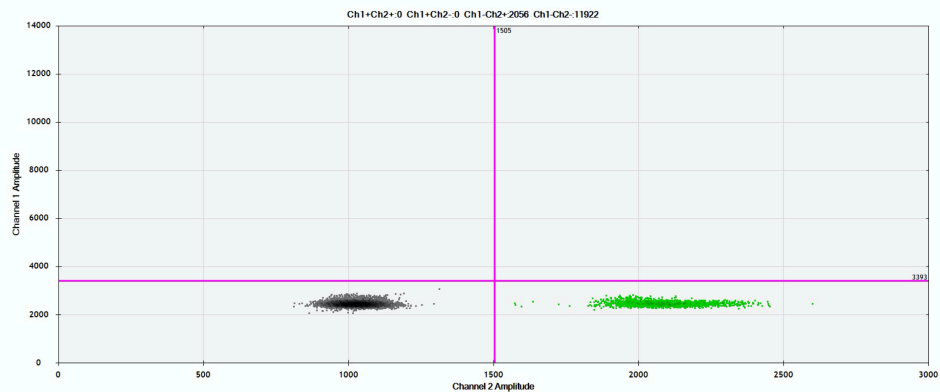

## D: Mixed infection

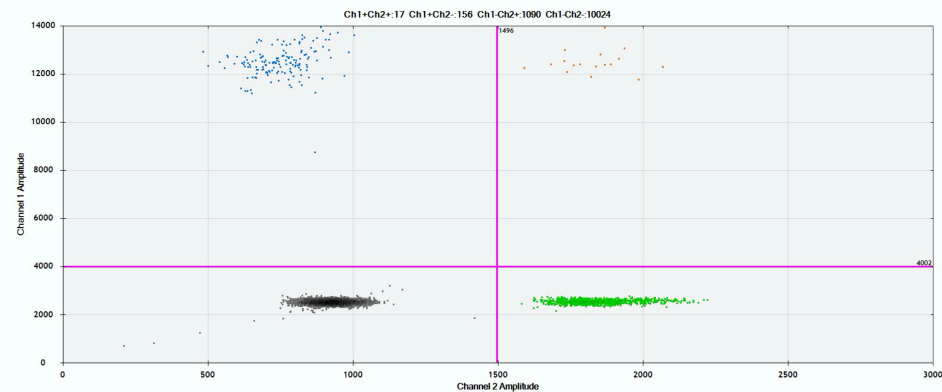

Supplement: supp [file elife-72083-supp-v1.zip]
